# Supplementary material for: Half-lives of PFOS, PFHxS and PFOA after end of exposure to contaminated drinking water
Source: PubMed Central journal article supplement — Occup Environ Med. 2017 Nov 13;75(1):46–51. doi: 10.1136/oemed-2017-104651 (PMC5749314; doi:10.1136/oemed-2017-104651), 2017-11-13
Supplement: oemed-2017-104651supp001.pdf [file oemed-2017-104651supp001.pdf]

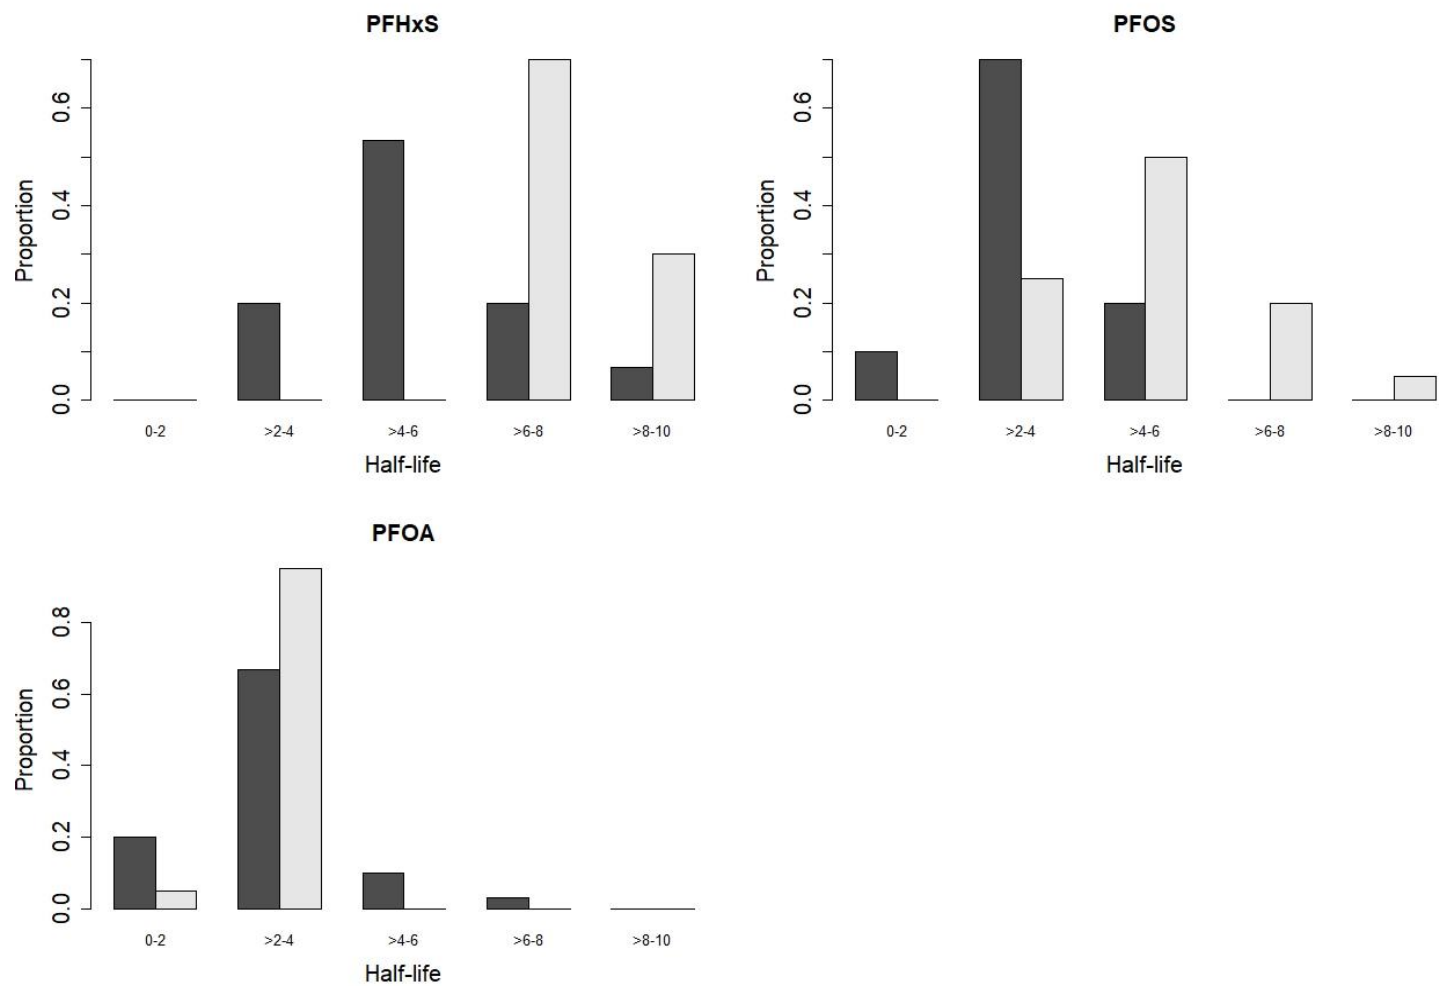

Figure S1: The inter-individual variation of half-lives for PFAS in a subgroup aged 15-50 from the panel study includes 30 women and 20 men. The dark bars are for the women and the light bars are for the men.
